# Supplementary material for: Timothy Mutation Disrupts the Link between Activation and Inactivation in CaV1.2 Protein
Source: PubMed Central journal article supplement — J Biol Chem. 2011 Jun 17;286(36):31557–64. doi: 10.1074/jbc.M111.255273 (PMC3173108; doi:10.1074/jbc.m111.255273), 2011-06-17
Supplement: supp_M111.255273_Supplemental_material_corrected.pdf [file supp_M111.255273_Supplemental_material_corrected.pdf]

### Supplemental material

|        |     |                                   |
|--------|-----|-----------------------------------|
| Cav1.1 | I   | EWPWIYFVTLILLGSFFILNVLGVLSGEFT    |
| Cav1.2 | I   | ELPWVYFVSLVIFGSFFVLNLVLGVISGEFS   |
| Cav1.3 | I   | ELPWVYFVSLVIFGSFFVLNLVLGVLSGEFS   |
| Cav1.4 | I   | ELPWVYFVSLVIFGSFFVLNLVLGVLSGEFS   |
| Cav2.1 | I   | TWNWLYFIPLIIIGSFFMLNLVLGVLSGEFA   |
| Cav2.2 | I   | TWNWLYFIPLIIIGSFFMLNLVLGVLSGEFA   |
| Cav2.3 | I   | TWNWLYFIPLIIIGSFFVLNLVLGVLSGEFA   |
| Cav3.1 | I   | FYNFIYFILLIIVGSFFMINLCLVVIATQFS   |
| Cav3.2 | I   | FYNFIYFILLIIVGSFFMINLCLVVIATQFS   |
| Cav3.3 | I   | FYNFIYFILLIIVGSFFMINLCLVVIATQFS   |
| Cav1.1 | II  | MLVCIYFIILFVCGNYILLNVFLAIAVDNLA   |
| Cav1.2 | II  | MLVCIYFIILFICGNYILLNVFLAIAVDNLA   |
| Cav1.3 | II  | MIVCIYFIILFICGNYILLNVFLAIAVDNLA   |
| Cav1.4 | II  | MLVCIYFIILFICGNYILLNVFLAIAVDNLA   |
| Cav2.1 | II  | MVFSIYFIVLTLFGNYTLLNVFLAIAVDNLA   |
| Cav2.2 | II  | MFSSFYFIVLTLFGNYTLLNVFLAIAVDNLA   |
| Cav2.3 | II  | MWSAIYFIVLTLFGNYTLLNVFLAIAVDNLA   |
| Cav3.1 | II  | SWAALYFIALMTFGNYVLFNLLVAAILVEGFQ  |
| Cav3.2 | II  | SWAALYFIALMTFGNYVLFNLLVAAILVEGFQ  |
| Cav3.3 | II  | PWASLYFVALMTFGNYVLFNLLVAAILVEGFQ  |
| Cav1.1 | III | VEMAIFFIIYIILIAFFMMNIFVGFVIVTFQ   |
| Cav1.2 | III | VEISIFFIIYIIIIAFAFFMMNIFVGFVIVTFQ |
| Cav1.3 | III | VEISIFFIIYIIIVAFFMMNIFVGFVIVTFQ   |
| Cav1.4 | III | VEISVFFIVYIIIIAFAFFMMNIFVGFVIITFR |
| Cav2.1 | III | MEMSIFYVVYFVVFPPFFVNIFFVALIIITFQ  |
| Cav2.2 | III | MELSIFYVVYFVVFPPFFVNIFFVALIIITFQ  |
| Cav2.3 | III | MEMSIFYVVYFVVFPPFFVNIFFVALIIITFQ  |
| Cav3.1 | III | PWMLLYFISFLLIVAFFVLNMFVGVVVENFH   |
| Cav3.2 | III | PWMLLYFISFLLIVSFFVLNMFVGVVVENFH   |
| Cav3.3 | III | PWMLLYFISFLLIVSFFVLNMFVGVVVENFH   |
| Cav1.1 | IV  | NFAYYYFISFYMLCAFLVINLFAVIMDNFD    |
| Cav1.2 | IV  | SFAVYFISFYMLCAFLIINLFAVIMDNFD     |
| Cav1.3 | IV  | NFAIVYFISFYMLCAFLIINLFAVIMDNFD    |
| Cav1.4 | IV  | NFAIAYFISFFMLCAFLIINLFAVIMDNFD    |
| Cav2.1 | IV  | EFAYFYFVSFIFLCSFLMLNLFVAVIMDNFE   |
| Cav2.2 | IV  | DFAYFYFVSFIFLCSFLMLNLFVAVIMDNFE   |
| Cav2.3 | IV  | DLAYVYFVSFIFFCFLMLNLFVAVIMDNFE    |
| Cav3.1 | IV  | VISPIYFVSFVLTAQFVLVNVVIAVLMKHLE   |
| Cav3.2 | IV  | ALSPVYFVTFVLVAQFVLVNVVAVLMKHLE    |
| Cav3.3 | IV  | FVSPLYFVSFVLTAQFVLINVVAVLMKHL     |

Fig. S1. Alignment of S6 helices from all ten human Ca<sub>v</sub> channels

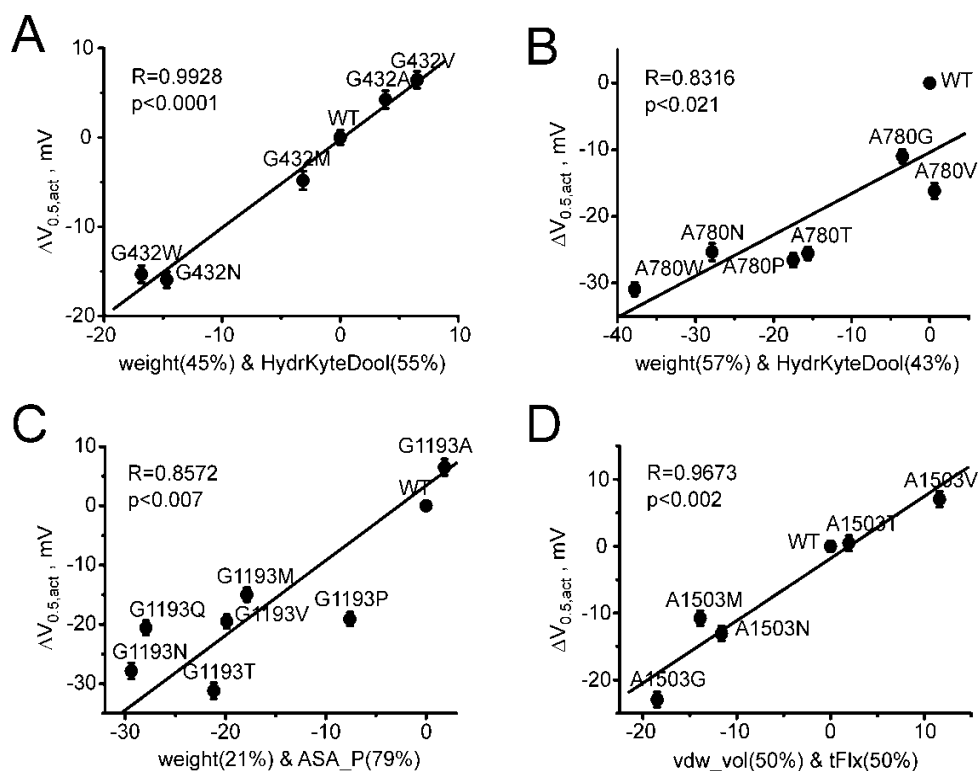

**Fig. S2.** Role of residue size in channel activation in S6 segments of  $Ca_v1.2$ .

Correlation between the shifts of the activation curves ( $\Delta V_{act}$ ) and a linear combination of descriptors characterizing the size of amino acids (either molecular weight (A, B, C) or Van der Waals volume<sup>1</sup> (D)) in combination with hydrophobicity indices such as HydrKyteDool<sup>2</sup> or ASA\_P<sup>3</sup> (A, B, C) or a flexibility index<sup>4</sup> (D) with the shifts of the activation curve.

<sup>1</sup> vdW\_vol – Van der Waals volume

<sup>2</sup> HydrKyteDool – hydrophobicity (1)

<sup>3</sup> ASA\_P – Water accessible surface area of all polar atoms. Accessible surface area refers to the water accessible surface area using a probe radius of 1.4 Angstroms.

<sup>4</sup> tFlx - Amino acid side chain flexibility (2)

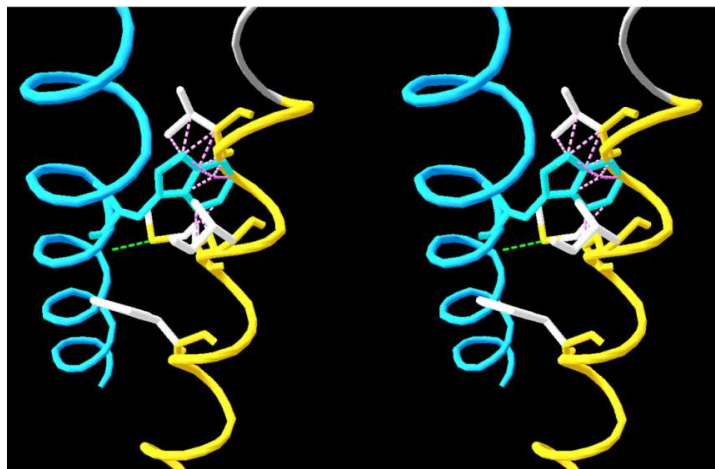

Fig. S3. Schematic illustration of packing distortions due to insertion of bulky hydrophobic residues in position G432. Stereo view of helices IS6 (cyan) neighboring IVS6 (yellow). G432 was mutated to W432 using Deep View software (3). Unfavorable steric interactions are shown as pink dots.

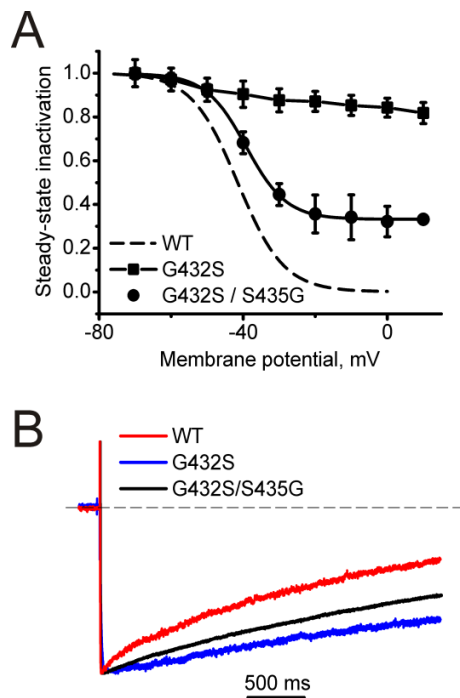

**Fig. S4.** Mutation S435G partially rescue channel inactivation.

**A,** Averaged inactivation curves of double mutation G432S/S435G in comparison with wild-type.

**B,** Representative  $I_{Ba}$  through wild-type and indicated mutant channels during depolarizing test pulses from  $-100$  mV to the peak potentials of the current-voltage relationships (see Table 1 for mean  $r_{3000}$  and  $V_{0.5,inact}$ ).

## References

1. Kyte, J., and Doolittle, R. F. (1982) *J. Mol. Biol* **157**, 105-132
2. Gottfries, J., and Eriksson, L. (2010) *Mol. Divers* **14**, 709-718
3. Guex, N. and Peitsch, M.C. (1997) *Electrophoresis* **18**, 2714-2723
